# Supplementary material for: Rational design of 2D/2D ZnIn2S4/C3N4 heterojunction photocatalysts for enhanced photocatalytic H2 production
Source: Royal Society of Chemistry journal article supplement (doi:10.1039/d2nj06217h), 2023-01-01
Supplement: d2nj06217h1.pdf [file d2nj06217h1.pdf]

## Electronic Supplementary Information:

### **Rational design of 2D/2D ZnIn<sub>2</sub>S<sub>4</sub>/C<sub>3</sub>N<sub>4</sub> Heterojunction Photocatalysts for Enhanced Photocatalytic H<sub>2</sub> production**

Peng Guan<sup>a,b</sup>, Peigeng Han<sup>c\*</sup>, Bin Yang<sup>a,b</sup>, Hang Yin<sup>a,d</sup>, Jianyong Liu<sup>a,b</sup>, Songqiu  
Yang<sup>a,b\*</sup>

a State Key Laboratory of Molecular Reaction Dynamics, Dalian Institute of Chemical  
Physics, Chinese Academy of Science, Dalian 116023, P. R. China

b University of the Chinese Academy of Sciences, Beijing 100049, P. R. China

c Institute of Molecular Sciences and Engineering, Institute of Frontier and  
Interdisciplinary Science, Shandong University, Qingdao 266237 P. R. China.

d College of Materials and Chemistry, China Jiliang University, Hangzhou 310018,  
China

\*Corresponding author: Peigeng Han, e-mail: [hanpeigeng@sdu.edu.cn](mailto:hanpeigeng@sdu.edu.cn), Songqiu Yang,  
e-mail: [sqyang@dicp.ac.cn](mailto:sqyang@dicp.ac.cn)

## **Experimental**

### **Sample preparation**

#### **Preparation of C<sub>3</sub>N<sub>4</sub>(180) nanosheets**

Typically, 2.0 g melamine were added to 35 mL deionized water and stirred for 1 hour. Then, white melamine precursors were placed in 50 mL Teflon-lined autoclave and heated at 180 °C for 12 h in the oven. The obtained precursors were washed with deionized H<sub>2</sub>O and dried in vacuum at 70 °C. Last, the obtained precursors were added to an alumina crucible and heated in muffle furnace (550 °C, 2.3 °C min<sup>-1</sup>, 4 h). The products were obtained and marked as C<sub>3</sub>N<sub>4</sub>(180). For comparison, the pristine C<sub>3</sub>N<sub>4</sub> was got by thermal calcination of melamine (550 °C, 2.3 °C min<sup>-1</sup>, 4 h).

#### **Preparation of ZnIn<sub>2</sub>S<sub>4</sub> nanosheets**

The  $\text{ZnIn}_2\text{S}_4$  nanosheet was synthesized by the hydrothermal way, 0.2 mmol  $\text{Zn}(\text{CH}_3\text{COO})_2 \cdot 2\text{H}_2\text{O}$ , 0.4 mmol  $\text{InCl}_3 \cdot 4\text{H}_2\text{O}$  and 1.6 mmol TAA were added to 30 mL solution (15 mL  $\text{H}_2\text{O}$  and 15 mL ethanol). The solution was vigorously stirred for 30 min until the solution was transparent. Then, the above solution was placed into a 50 mL Teflon-lined autoclave and heated at 180 °C for 24 h. The obtained sample was washed with deionized water and ethanol, and then dried in vacuum at 80 °C.

### **Preparation of 2D $\text{ZnIn}_2\text{S}_4$ /2D $\text{C}_3\text{N}_4(180)$ heterojunction**

First, 0.14 mmol  $\text{Zn}(\text{CH}_3\text{COO})_2 \cdot 2\text{H}_2\text{O}$ , 0.28 mmol  $\text{InCl}_3 \cdot 4\text{H}_2\text{O}$  and 1.12 mmol TAA were added to 30 mL solution (15 mL  $\text{H}_2\text{O}$  and 15 mL ethanol). The solution was vigorously stirred for 30 min until the solution was transparent. Then, 0.1 g  $\text{C}_3\text{N}_4(180)$  nanosheets were added to the above solution and stirred for 30 min. Finally, the mixed solution was placed into a 50 mL Teflon-lined autoclave and heated at 180 °C for 24 h. The obtained sample was washed with deionized water and ethanol and then dried in vacuum at 80 °C. Various mass ratios of  $\text{ZnIn}_2\text{S}_4$  nanosheets were studied for optimal proportion, including 20, 30, 40 and 50 wt.%, and the samples were marked as  $\text{XZnIn}_2\text{S}_4/\text{C}_3\text{N}_4(180)$ , where  $X = 20, 30, 40$  and  $50$ . Besides, the preparation process of  $40\text{ZnIn}_2\text{S}_4/\text{C}_3\text{N}_4$  is similar to that of  $40\text{ZnIn}_2\text{S}_4/\text{C}_3\text{N}_4(180)$  except that  $\text{C}_3\text{N}_4(180)$  was replaced by  $\text{C}_3\text{N}_4$ .

### **Characterization**

Powder X-ray diffraction (PXRD) was tested by D/MAX-2500 diffractometer (Empyrean-100, Holland). Fourier transform infrared spectra (FT-IR) was tested by Nicolet iS50 spectrometer (America). Scanning electron microscopy (SEM) and transmission electron microscopy (TEM) were tested on S-4800 field emission SEM (JSM-7800F, Japan) and transmission electron microscopy (JEM-2100, Japan). The thickness of samples was tested by using Asylum Research MFP930 (America) on the atomic force microscopy (AFM). The X-ray photoelectron spectroscopy (XPS) was tested by ThermoFisher Escalab 250 Xi+ instrument (America). UV-vis absorption spectra were tested by Shimadzu UV-2450 spectrophotometer (Japan). The nitrogen adsorption and desorption isotherms were tested by Quadrasorb evo analyzer (America). The steady-state and transient photoluminescence (PL) spectra were tested

by the QM400 instrument (America). The photoelectrochemical performance was tested by the CHI760D (Chenhua, China) electrochemical workstation.

### **Photocatalytic H<sub>2</sub> production experiments**

The photocatalytic H<sub>2</sub> production was studied by the Labsolar-6A system (Beijing Perfectlight Technology Co., Ltd., China). The photocatalytic reactor was irradiated via the 300 W Xenon lamp (PLS-SXE300+, Beijing Perfectlight, China). First, 50 mg photocatalysts sample and 10 mL triethanolamine were added into 90 mL H<sub>2</sub>O solution. Then, 2 mL H<sub>2</sub>PtCl<sub>6</sub> aqueous solution was added for co-catalyst Pt (~ 3 wt % Pt). Last, the photocatalytic reactor was vacuumed and the temperature was kept at 5 °C. The photocatalytic H<sub>2</sub> production was checked via the gas chromatography apparatus (GC9790II, Fuli instruments Co., Ltd., China).

The apparent quantum efficiency (AQE) of the photocatalytic H<sub>2</sub> production is calculated from equation as follows:

$$AQE = \frac{2 \times \text{the number of evolved H molecules}}{\text{the number of incident photons}} \times 100\%$$

The solar-to-hydrogen (STH) conversion efficiency is given by:

$$STH = \frac{R(H_2) \times \Delta G_r}{P \times S} \times 100\%$$

Where R(H<sub>2</sub>), ΔG<sub>r</sub>, P, and S represent the rate of hydrogen evolution, the Gibbs energy for the reaction (H<sub>2</sub>O (l) → H<sub>2</sub> (g) + 1/2 O<sub>2</sub> (g)), the energy intensity of the AM1.5G solar irradiation (100mW cm<sup>-2</sup>) and the irradiated sample area (20 cm<sup>2</sup>), respectively.

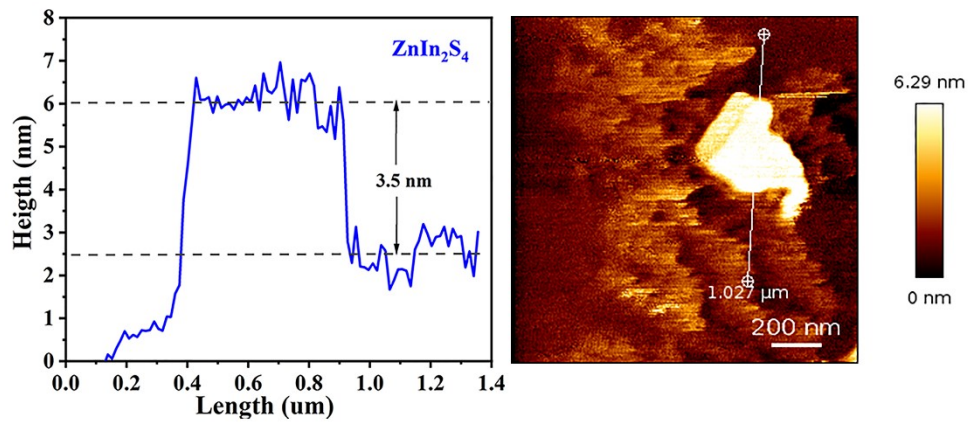

Fig. S1 AFM images and thickness of  $\text{ZnIn}_2\text{S}_4$ .

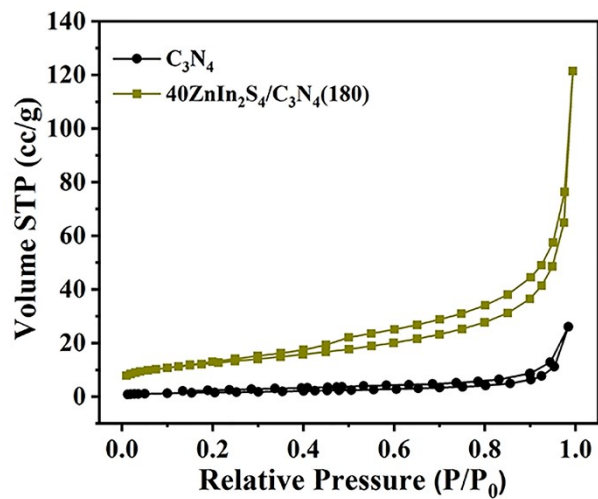

**Fig. S2** Nitrogen adsorption-desorption isotherms of  $C_3N_4$  and  $40ZnIn_2S_4/C_3N_4(180)$ .

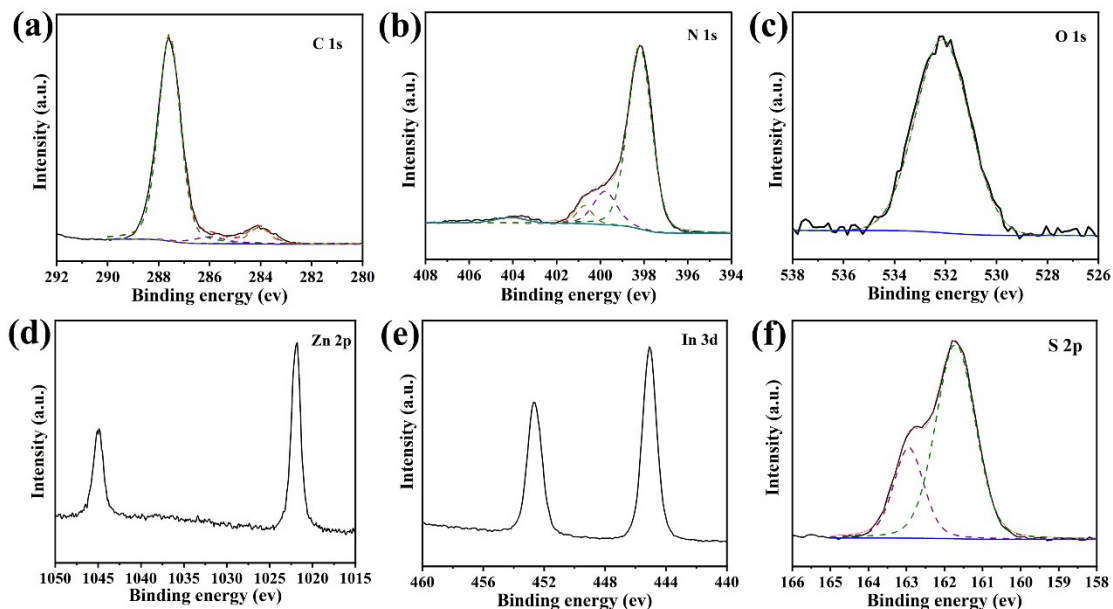

**Fig. S3** (a) C 1s XPS spectrum, (b) N 1s XPS spectrum, (c) O 1s XPS spectrum, (d) Zn 2p XPS spectrum, (e) In 3d XPS spectrum, (f) S 2p XPS spectrum of  $40ZnIn_2S_4/C_3N_4(180)$ .

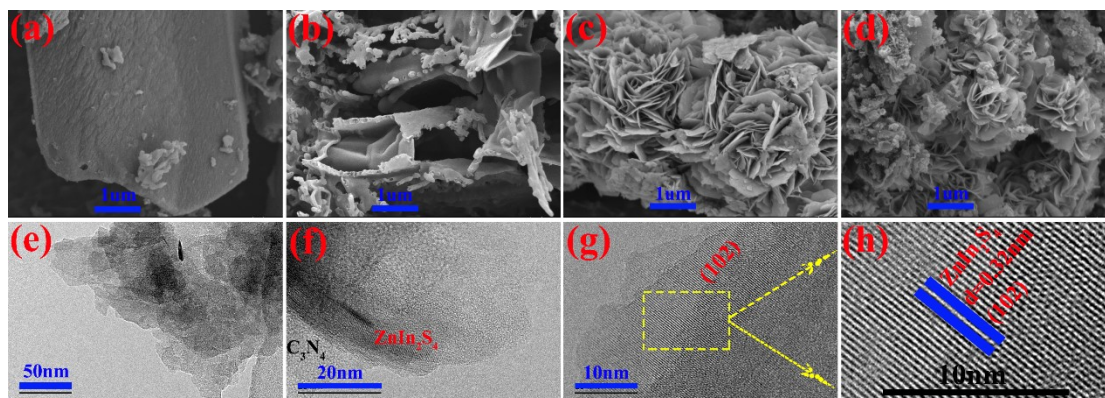

**Fig. S4** Typical SEM images of the recycled catalyst (a)  $C_3N_4$ , (b)  $C_3N_4(180)$ , (c)  $ZnIn_2S_4$ , (d)  $40ZnIn_2S_4/C_3N_4(180)$ . (e-h) TEM images of the recycled catalyst ( $40ZnIn_2S_4/C_3N_4(180)$ ).

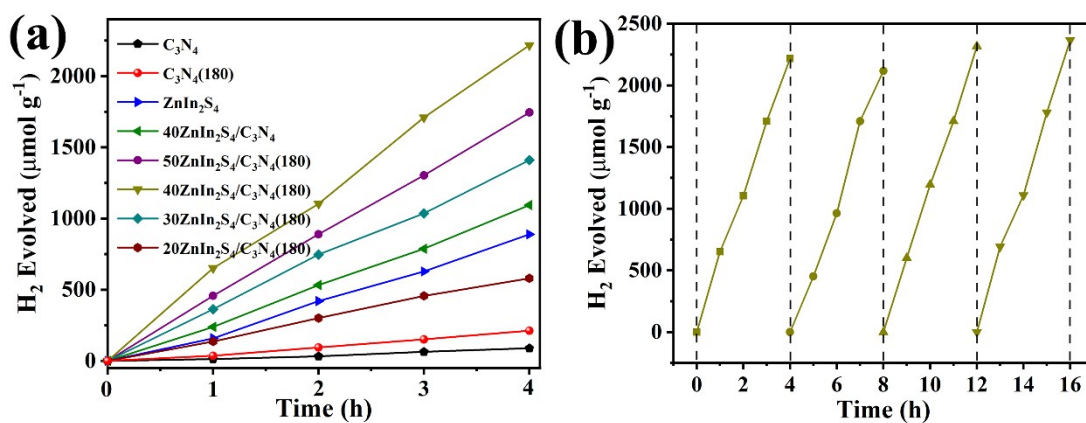

**Fig. S5** (a) Time courses of photocatalytic H<sub>2</sub> production without sacrificial agent. (b) Photocatalytic H<sub>2</sub> evolution stability of 40ZnIn<sub>2</sub>S<sub>4</sub>/C<sub>3</sub>N<sub>4</sub>(180) without sacrificial agent.

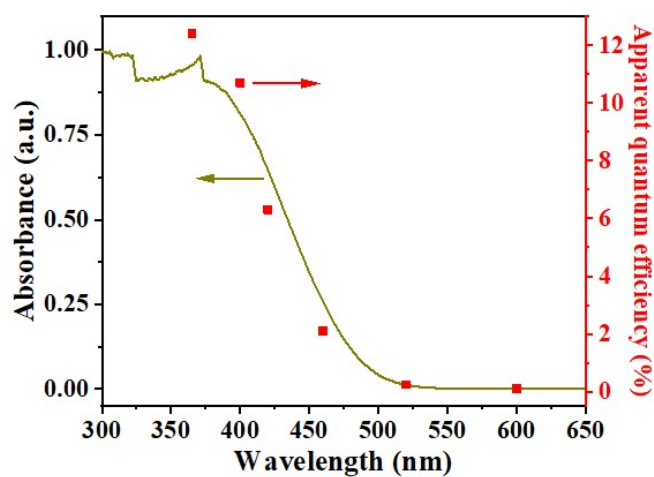

**Fig. S6** The wavelength dependent AQE of H<sub>2</sub> evolution over 40ZnIn<sub>2</sub>S<sub>4</sub>/C<sub>3</sub>N<sub>4</sub>(180).

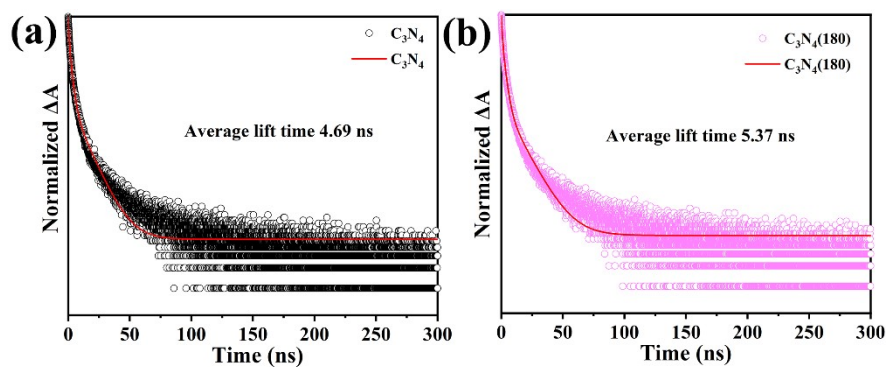

Fig. S7 The time-resolved PL spectra of (a)  $C_3N_4$  and (b)  $C_3N_4(180)$ .

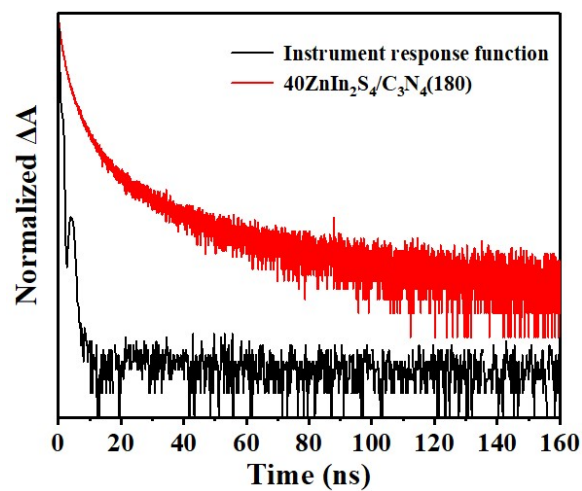

Figure S8 The instrument response function and time-resolved PL spectra of  $40ZnIn_2S_4/C_3N_4(180)$ .

**Table 1**

Comparative representation photocatalytic performances of ZnIn<sub>2</sub>S<sub>4</sub> based photocatalysts reported in other similar works.

| Sample                                                                      | Light Source               | Co-catalyst | Sacrificial agent                                  | Activity (μmol h <sup>-1</sup> g <sup>-1</sup> ) | Refs.     |
|-----------------------------------------------------------------------------|----------------------------|-------------|----------------------------------------------------|--------------------------------------------------|-----------|
| ZnIn <sub>2</sub> S <sub>4</sub> /g-C <sub>3</sub> N <sub>4</sub> /graphene | Solar light irradiation    | Not used    | Na <sub>2</sub> SO <sub>3</sub> /Na <sub>2</sub> S | 477                                              | [1]       |
| ZnIn <sub>2</sub> S <sub>4</sub> /g-C <sub>3</sub> N <sub>4</sub>           | 400 W Xe lamp (λ > 420 nm) | Pt          | TEOA                                               | 450                                              | [2]       |
| Au/g-C <sub>3</sub> N <sub>4</sub> /ZnIn <sub>2</sub> S <sub>4</sub>        | 300 W Xe lamp (λ > 420 nm) | Pt          | Na <sub>2</sub> SO <sub>3</sub> /Na <sub>2</sub> S | 973                                              | [3]       |
| Zn <sub>3</sub> In <sub>2</sub> S <sub>6</sub> /FCN                         | 300 W Xe lamp (λ > 420 nm) | Pt          | Na <sub>2</sub> SO <sub>3</sub> /Na <sub>2</sub> S | 510                                              | [4]       |
| ZnIn <sub>2</sub> S <sub>4</sub> /g-C <sub>3</sub> N <sub>4</sub>           | 300 W Xe lamp (λ > 420 nm) | Not used    | TEOA                                               | 956                                              | [5]       |
| ZnIn <sub>2</sub> S <sub>4</sub> /C <sub>3</sub> N <sub>4</sub>             | 300 W Xe lamp (λ > 420 nm) | Pt          | TEOA                                               | 2016.94                                          | This work |

[1] S. Manchala, V. S. R. K. Tandava, L. R. Nagappagari, S. M. Venkatakrishnan, D. Jampaiah, Y. M. Sabri, S. K. Bhargava and V. Shanker, *Photoch. Photobio. Sci.*, 2019, 18, 2952–2964.

[2] L. R. Nagappagari, S. Samanta, N. Sharma, V. R. Battula and K. Kailasam, *Sustain. Energ. Fuels.*, 2020, 4, 750–759.

[3] X. M. Liu, S. Q. Wang, F. Yang, Y. C. Zhang, L. S. Yan, K. X. Li, H. Q. Guo, J. J. Yan and J. Lin, *Int. J. Hydrogen. Energ.*, 2022, 47, 2900–2913.

[4] Y. Wu, H. Wang, W. G. Tu, Y. Liu, S. Y. Wu, Y. Z. Tan and J. W. Chew, *Appl. Catal. B-Environ.*, 2018, 233, 58–69.

[5] H. Liu, Z. T. Jin, Z. Z. Xu, Z. Zhang and D. Ao, *RSC Adv.*, 2015, 5, 97951–97961.
